# Supplementary material for: Effects of rational emotive behavior therapy on alexithymia, anxiety, depression and sleep quality of older people in nursing homes: a quasi-experimental study
Source: PubMed Central journal article supplement (PMC10463404; doi:10.1186/s12912-023-01449-9), 2023-08-24
Supplement: 12912_2023_1449_MOESM1_ESM.pdf [file 12912_2023_1449_MOESM1_ESM.pdf]

**Appendix A** Rational emotive behavior therapy theme, objective and content of each week

| <b>Theme</b>                                          | <b>Objective</b>                                                                                                                                                    | <b>Content</b>                                                                                                                                          |
|-------------------------------------------------------|---------------------------------------------------------------------------------------------------------------------------------------------------------------------|---------------------------------------------------------------------------------------------------------------------------------------------------------|
| First week:<br>establish a trust<br>relationship      | 1. Introduction.                                                                                                                                                    | 1. Introduction.                                                                                                                                        |
|                                                       | 2. Introduce the purpose and content of the intervention and deliver its booklet.                                                                                   | 2. Expresses understanding of the study content and alexithymia.                                                                                        |
|                                                       | 3. Explain the definition, assessment and adverse effects of alexithymia.                                                                                           | 3. Express willingness and expectation to cooperate with the intervention.                                                                              |
|                                                       | 4. Make an appointment for the next visit.                                                                                                                          | 4. Determine relevant details for the next visit.                                                                                                       |
| Second week:<br>conduct<br>psychological<br>diagnosis | 1. Ensure that the elderly understand alexithymia.                                                                                                                  | 1. Explain alexithymia on their own.                                                                                                                    |
|                                                       | 2. Identify existing problems and their potential causes, classify these problems, and make notes to determine the most pressing problem to solve with the elderly. | 2. Describe life events related to alexithymia, depression, anxiety, sleep quality, etc., and the psychological process that occurred during the event. |
|                                                       | 3. Make an appointment for the next visit.                                                                                                                          | 3. Express the desire to resolve certain psychological problems.                                                                                        |
| Third week:<br>distinguish<br>irrational beliefs      | 1. Review the events and psychological problems mentioned the prior week.                                                                                           | 4. Determine relevant details for the next visit.                                                                                                       |
|                                                       | 2. Explain the irrational beliefs and give examples.                                                                                                                | 1. Discuss the events and psychological problems mentioned the prior week.                                                                              |
|                                                       | 3. Identify irrational beliefs expressed by the elderly.                                                                                                            | 2. Understand the irrational beliefs.                                                                                                                   |
|                                                       | 4. Make an appointment for the next visit.                                                                                                                          | 3. Explore their own irrational beliefs in light of experiences.                                                                                        |
| Fourth week:<br>debate with<br>irrational beliefs     | 1. Review relevant events and irrational beliefs, and guide the elderly in dissecting and refuting them. Other cases can be used to identify and refute the claim.  | 4. Express the willingness to change irrational beliefs.                                                                                                |
|                                                       | 2. Evaluate their ability to identify and                                                                                                                           | 5. Determine relevant details for the next visit.                                                                                                       |
|                                                       |                                                                                                                                                                     | 1. Discuss last week's described events and irrational beliefs.                                                                                         |
|                                                       |                                                                                                                                                                     | 2. Acquire the skill of debating irrational beliefs and gain experience via practice (my own example, other cases, videos, etc.).                       |

---

|                                                                               |                                                                                                                                                                                                                                                                                                                                                                                                              |                                                                                                                                                                                                                                                                                                                                                                                                                                                                   |
|-------------------------------------------------------------------------------|--------------------------------------------------------------------------------------------------------------------------------------------------------------------------------------------------------------------------------------------------------------------------------------------------------------------------------------------------------------------------------------------------------------|-------------------------------------------------------------------------------------------------------------------------------------------------------------------------------------------------------------------------------------------------------------------------------------------------------------------------------------------------------------------------------------------------------------------------------------------------------------------|
|                                                                               | <p>debate irrational beliefs, and encourage them to apply the method to improve their mental health and more openly express their feelings and needs in everyday life.</p> <p>3. Set personalized homework with the elderly and encourage them to complete it.</p> <p>4. Make an appointment for the next visit.</p>                                                                                         | <p>3. Express a willingness to apply the debate method in everyday life.</p> <p>4. Understand and finish the assigned homework.</p> <p>5. Determine relevant details for the next visit.</p> <p>Assignment 1: Apply the method in your daily life and share your experience the next week.</p>                                                                                                                                                                    |
| <p>Fifth week:<br/>make positive changes</p>                                  | <p>1. Examine the assigned homework, determine the difficulties in completing it, and assess its completion.</p> <p>2. Provide reinforcement for the difficulties, encourage the elderly to persist in applying and changing their way of thinking and behaving, and apply the method to various emotional events.</p> <p>3. Assign new homework.</p> <p>4. Make an appointment for the next visit.</p>      | <p>1. Show the homework and emphasize its difficulty.</p> <p>2. Explore the process of debating irrational beliefs in depth.</p> <p>3. Express the willingness to actively apply the method in everyday life.</p> <p>4. Understand and complete the new homework.</p> <p>5. Determine relevant details for the next visit.</p> <p>Assignment 2: Develop a behavioral plan for coping with irrational beliefs and consider what to show with interventionists.</p> |
| <p>Sixth week:<br/>reinforce positive changes and keep a pleasant parting</p> | <p>1. Examine the assigned homework and assess its completion.</p> <p>2. Ask the elderly about their difficulties and concerns and assist them in resolving them; assess the ability to identify and refute irrational beliefs through real-world cases.</p> <p>3. Explain some everyday healthcare techniques for physical illnesses.</p> <p>4. Encourage the elderly to use REBT in their daily lives.</p> | <p>1. Demonstrate and discuss the homework with the interventionists.</p> <p>2. Describe and address any application-related concerns.</p> <p>3. Acquire some healthcare techniques for physical illnesses.</p> <p>4. Express a willingness to apply the method in everyday life.</p> <p>5. Express the emotion of separation and deal with it positively.</p>                                                                                                    |

---

---

5. Express well wishes and address parting  
feelings.

---
